# Supplementary material for: In vitro Interactions of Pseudomonas aeruginosa With Scedosporium Species Frequently Associated With Cystic Fibrosis
Source: PubMed Central journal article supplement (PMC6414507; doi:10.3389/fmicb.2019.00441), 2019-03-06
Supplement: Data_Sheet_1.pdf [file Data_Sheet_1.pdf]

## ***In Vitro* Interactions of *Pseudomonas aeruginosa* with *Scedosporium* Species Frequently Associated with Cystic Fibrosis**

Mónika Homa<sup>1,2\*</sup>, Alexandra Sándor<sup>1,2</sup>, Eszter Tóth<sup>1,3</sup>, Csilla Szebenyi<sup>1,2,3</sup>, Gábor Nagy<sup>1,3</sup>, Csaba Vágvolgyi<sup>2,3</sup>, Tamás Papp<sup>1,2,3</sup>

<sup>1</sup>MTA-SZTE “Lendület” Fungal Pathogenicity Mechanisms Research Group, Szeged, Hungary

<sup>2</sup>Department of Microbiology, Faculty of Science and Informatics, University of Szeged, Szeged, Hungary

<sup>3</sup>Interdisciplinary Excellence Centre, Department of Microbiology, University of Szeged, Szeged, Hungary

**\*Correspondence:**

Mónika Homa

homamoni@gmail.com

## Inter-kingdom interactions between CF pathogens.

**Table 1S** Indirect inhibitory effect of bacterial diffusible molecules on the growth of *Scedosporium* spp. and *A. fumigatus* SZMC 23245 grown on RPMI-agar and on SCFM plates. While on RPMI-1640 agar mainly complete, on SCFM only partial inhibition zones were observed. Partial inhibition was read at the first point of significant reduce in growth (approximately 50-80% as judged by the naked eye). Results are the mean of three independent experiments.

| Strain                            | <i>P. aeruginosa</i> ATCC 27853 |                                | <i>P. aeruginosa</i> ATCC 19429 |                                |
|-----------------------------------|---------------------------------|--------------------------------|---------------------------------|--------------------------------|
|                                   | Complete inhibition<br>(RIA±SD) | Partial inhibition<br>(RIA±SD) | Complete inhibition<br>(RIA±SD) | Partial inhibition<br>(RIA±SD) |
| <b>RPMI-agar</b>                  |                                 |                                |                                 |                                |
| <i>S. angustum</i> CBS 254.72     | + (0.16±0.14)                   | + (0.40±0.00)                  | -                               | + (0.71±0.48)                  |
| <i>S. boydii</i> CBS 117410       | + (0.38±0.16)                   | -                              | + (0.70±0.48)                   | + (0.08±0.17)                  |
| <i>S. boydii</i> CBS 117432       | + (0.83±0.13)                   | -                              | -                               | + (0.50±0.00)                  |
| <i>S. boydii</i> CBS 120157       | + (0.17±0.19)                   | + (0.72±0.39)                  | -                               | + (0.49±0.41)                  |
| <i>S. ellipsoideum</i> CBS 301.79 | + (0.24±0.26)                   | -                              | -                               | + (0.65±0.47)                  |
| <i>S. aurantiacum</i> CBS 116910  | + (0.20±0.22)                   | -                              | -                               | + (0.33±0.58)                  |
| <i>S. aurantiacum</i> CBS 136046  | + (0.40±0.11)                   | -                              | -                               | + (0.06±0.11)                  |
| <i>S. aurantiacum</i> CBS 136047  | + (0.17±0.24)                   | + (0.10±0.00)                  | -                               | + (0.25±0.50)                  |
| <i>S. aurantiacum</i> CBS 136049  | + (0.53±0.05)                   | -                              | -                               | + (0.07±0.15)                  |
| <i>S. apiospermum</i> SZMC 23374  | + (0.28±0.17)                   | -                              | -                               | + (0.17±0.26)                  |
| <i>A. fumigatus</i> SZMC 23245    | + (0.75±0.23)                   | -                              | -                               | -                              |
| <b>SCFM</b>                       |                                 |                                |                                 |                                |
| <i>S. angustum</i> CBS 254.72     | -                               | + (0.09±0.17)                  | -                               | -                              |
| <i>S. boydii</i> CBS 117410       | -                               | + (0.23±0.26)                  | -                               | -                              |
| <i>S. boydii</i> CBS 117432       | -                               | -                              | -                               | + (0.61±0.54)                  |
| <i>S. boydii</i> CBS 120157       | -                               | + (0.32±0.28)                  | -                               | + (0.33±0,58)                  |
| <i>S. ellipsoideum</i> CBS 301.79 | -                               | + (0.17±0,29)                  | -                               | + (0.33±0,58)                  |
| <i>S. aurantiacum</i> CBS 116910  | -                               | + (0.21±0.19)                  | -                               | + (0.33±0,58)                  |
| <i>S. aurantiacum</i> CBS 136046  | -                               | + (0.72±0.34)                  | -                               | + (0.33±0,58)                  |
| <i>S. aurantiacum</i> CBS 136047  | -                               | + (0.39±0.09)                  | -                               | -                              |
| <i>S. aurantiacum</i> CBS 136049  | -                               | + (0.57±0,18)                  | -                               | -                              |
| <i>S. apiospermum</i> SZMC 23374  | -                               | + (0.46±0.10)                  | -                               | + (1.00±0.87)                  |
| <i>A. fumigatus</i> SZMC 23245    | -                               | -                              | -                               | -                              |

+, inhibition zone was observed; -, inhibition zone was not detected;

**Abbreviations:** ATCC, American Type Culture Collection; CBS, Centraalbureau voor Schimmelcultures; RIA, relative inhibitory activity (RIA = area of the inhibition zone/area of the related bacterial colony); SCFM, synthetic cystic fibrosis medium; SZMC, Szeged Microbiological Collection.

## Inter-kingdom interactions between CF pathogens.

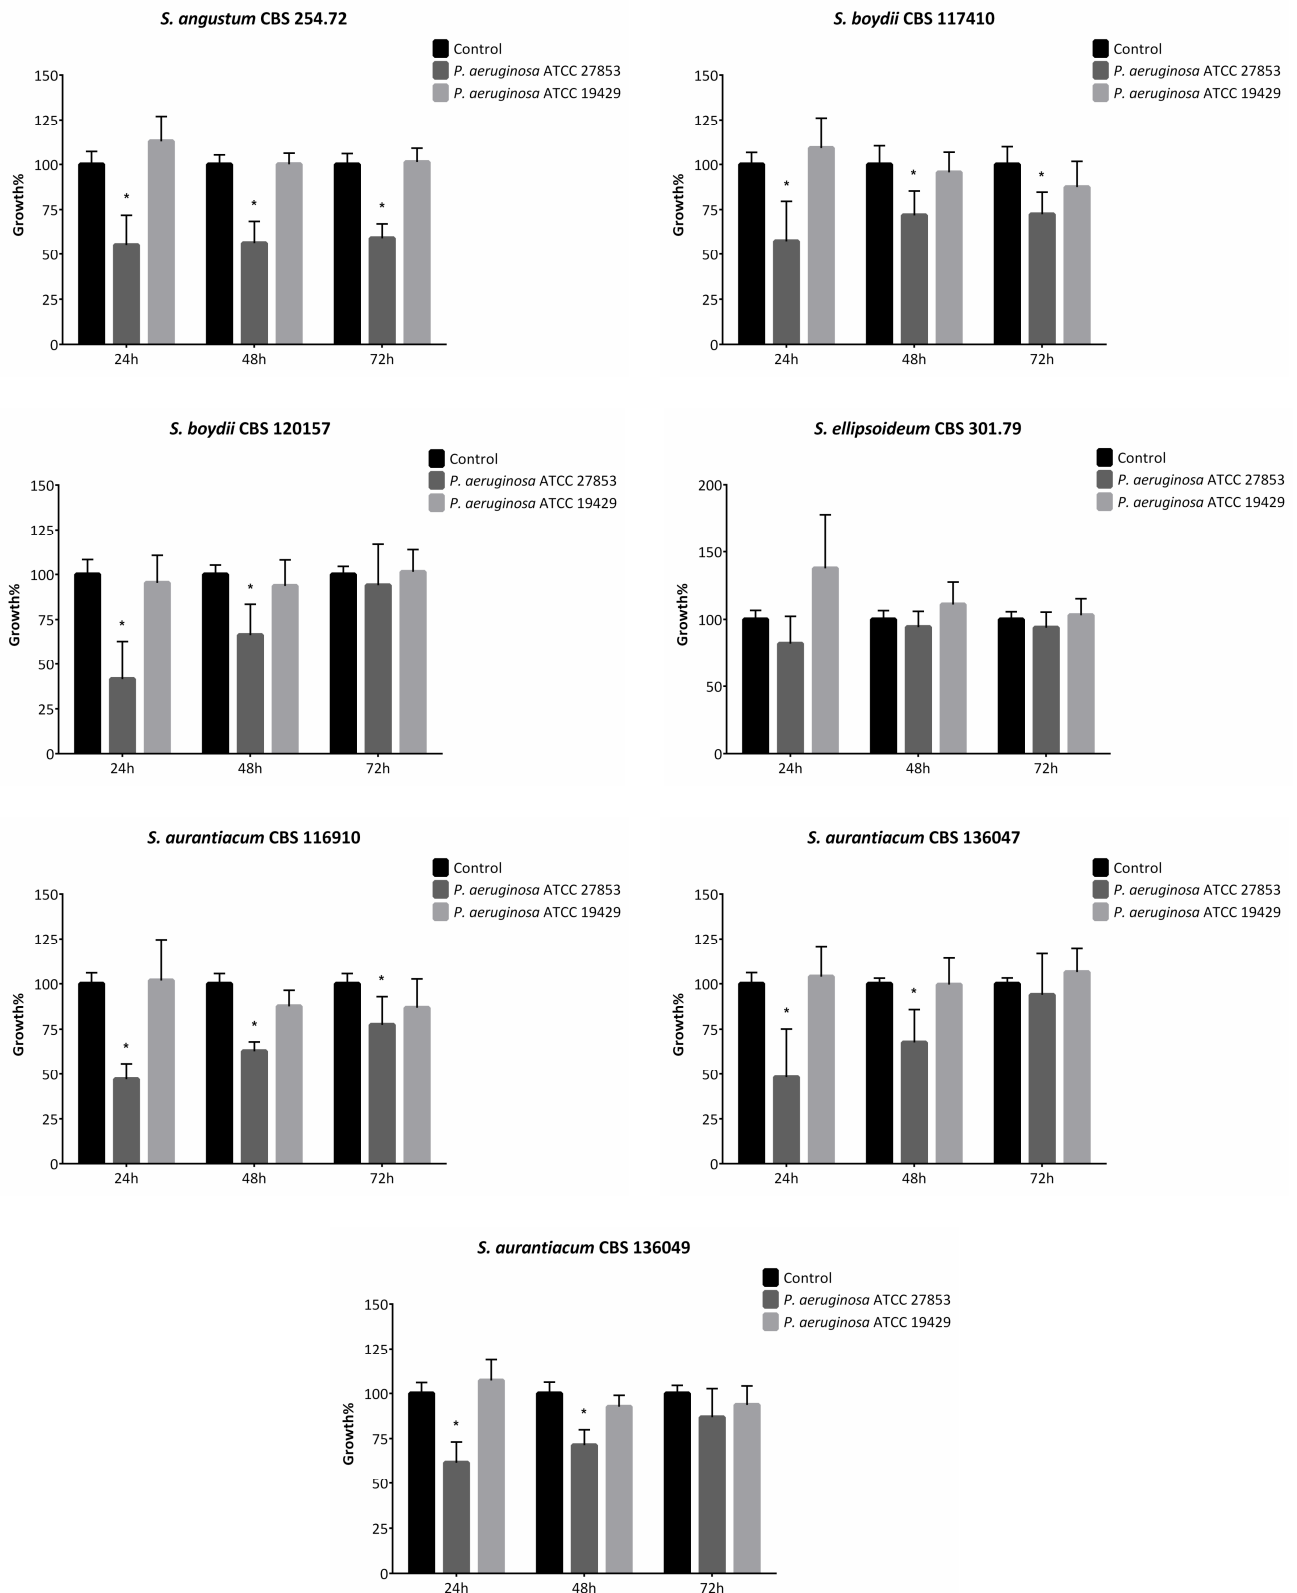

**Figure 1S** Indirect inhibitory effect of bacterial diffusible molecules on the growth of *Scedosporium* spp. grown in RPMI-1640 conditioned by *P. aeruginosa* strains. Results are the mean of three independent experiments with three individual replicates. Error bars indicate standard deviations. P values were calculated using unpaired t test, where  $p < 0.05$  was considered to be significant (indicated with asterisks).

## Inter-kingdom interactions between CF pathogens.

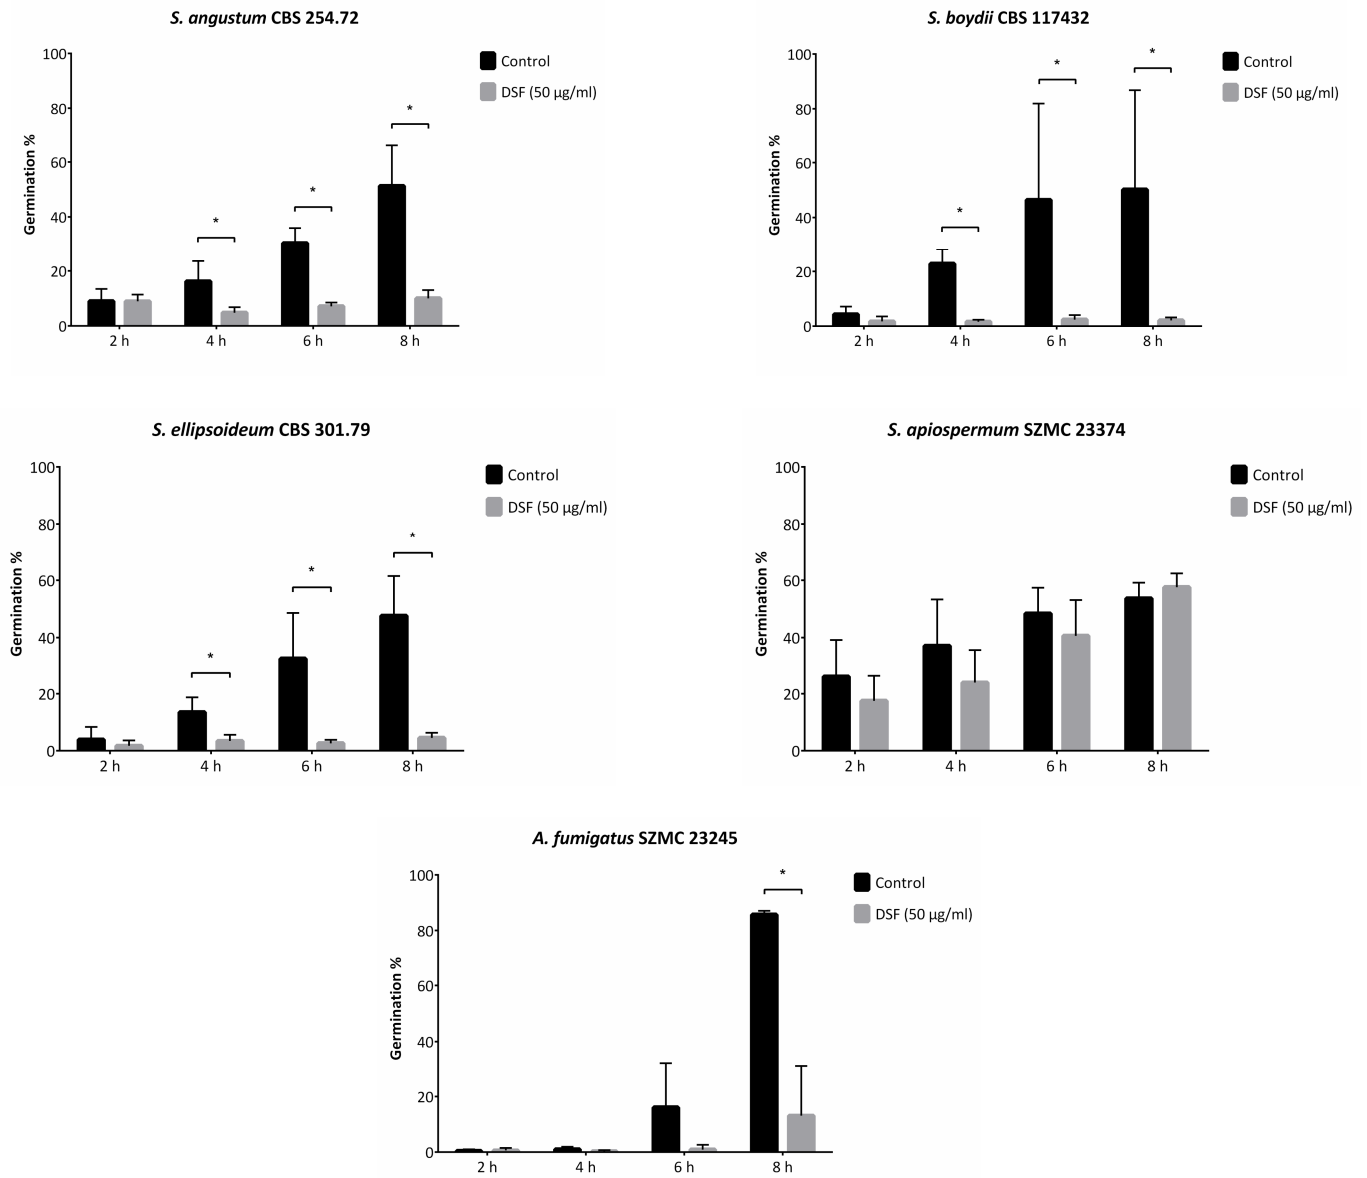

**Figure 2S** Germination ability of conidia collected from *Scedosporium* and *A. fumigatus* isolates in the presence of 50 µg/ml DSF. Results are the mean of three independent experiments. Error bars indicate standard deviations. P values were calculated using unpaired t test, where  $p < 0.05$  was considered to be significant (indicated with asterisks).

## Inter-kingdom interactions between CF pathogens.

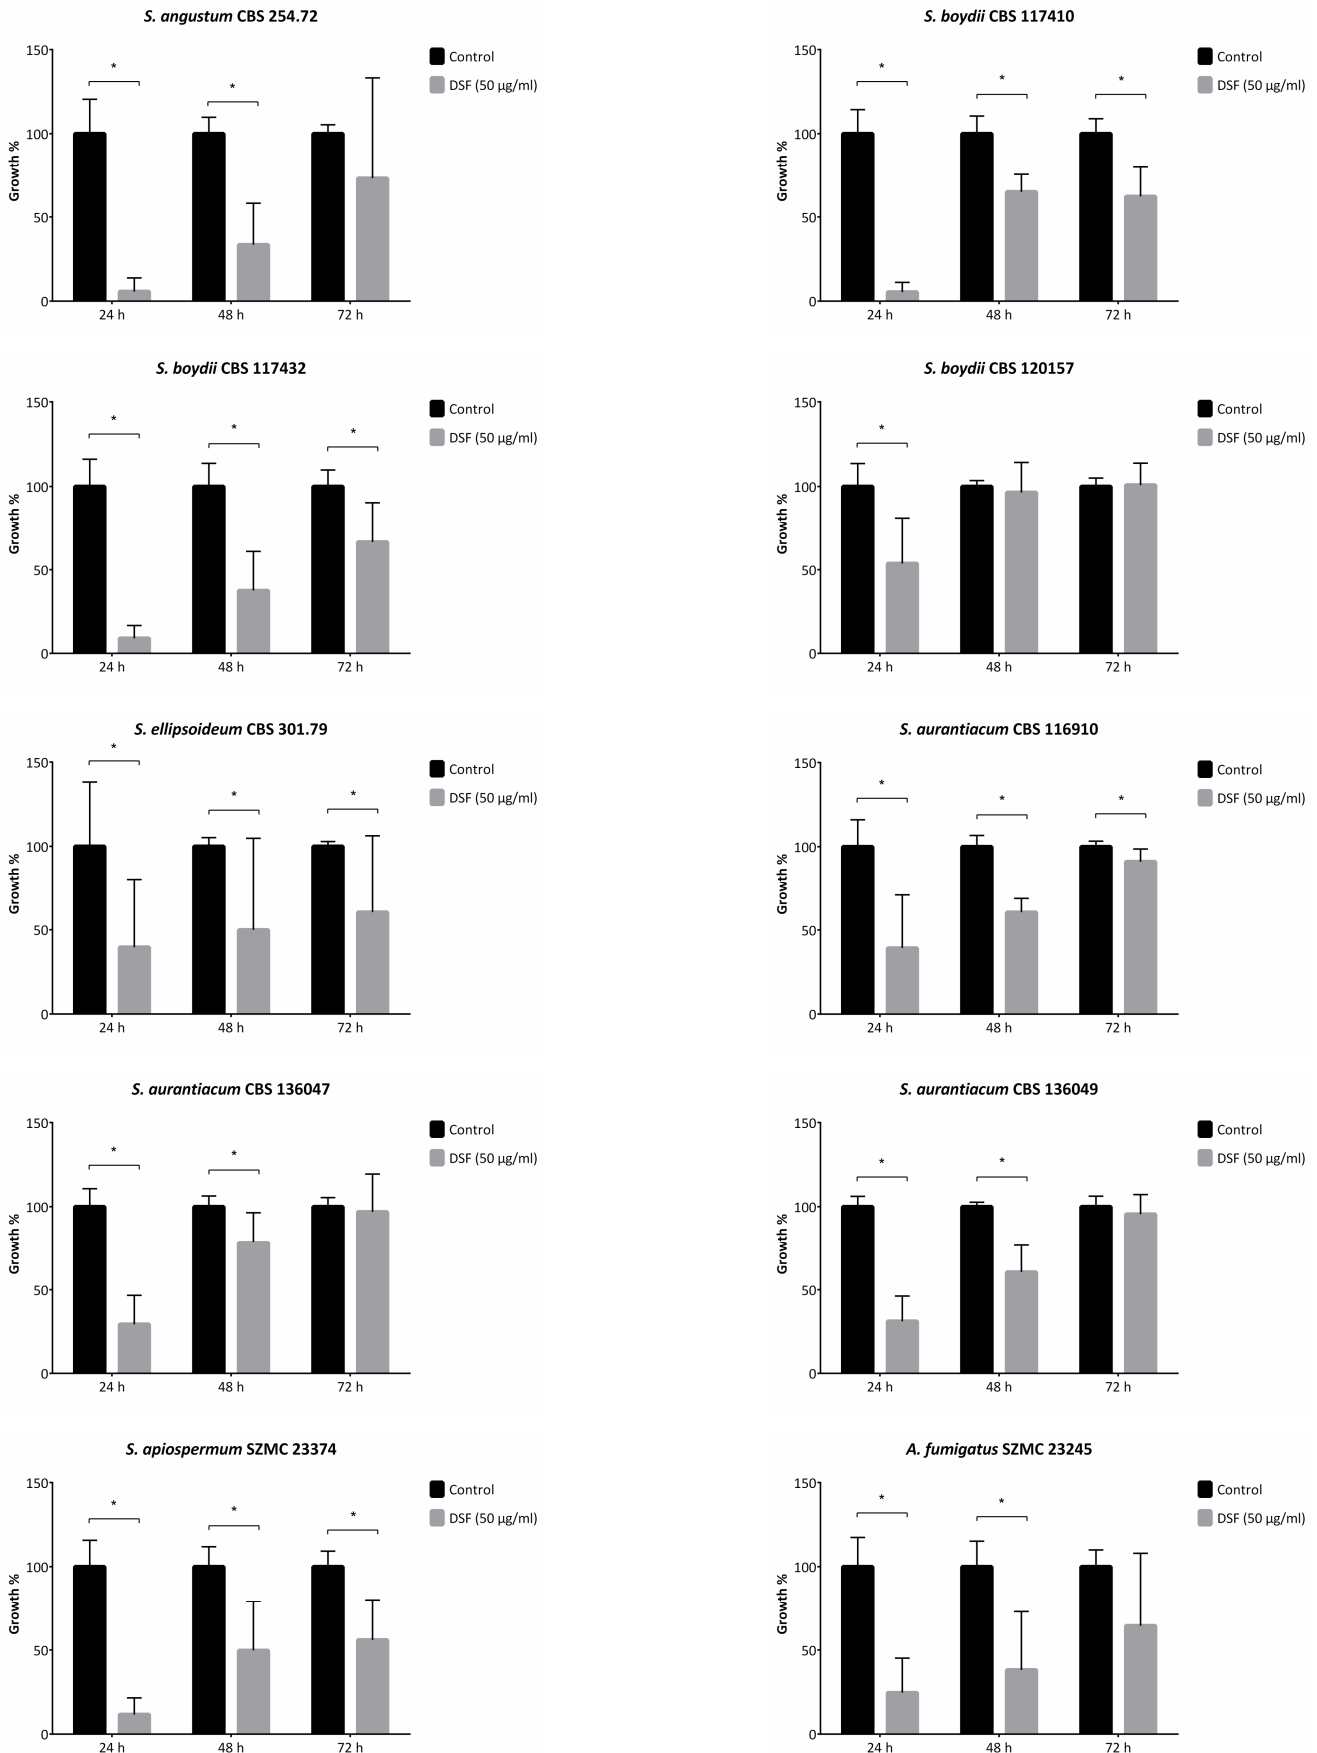

**Figure 3S** Growth rate of *Scedosporium* and *A. fumigatus* isolates in the presence of 50 µg/ml DSF. Results are the mean of three independent experiments with three individual replicates. Error bars indicate standard deviations. P values were calculated using unpaired t test, where  $p < 0.05$  was considered to be significant (indicated with asterisks).

## Inter-kingdom interactions between CF pathogens.

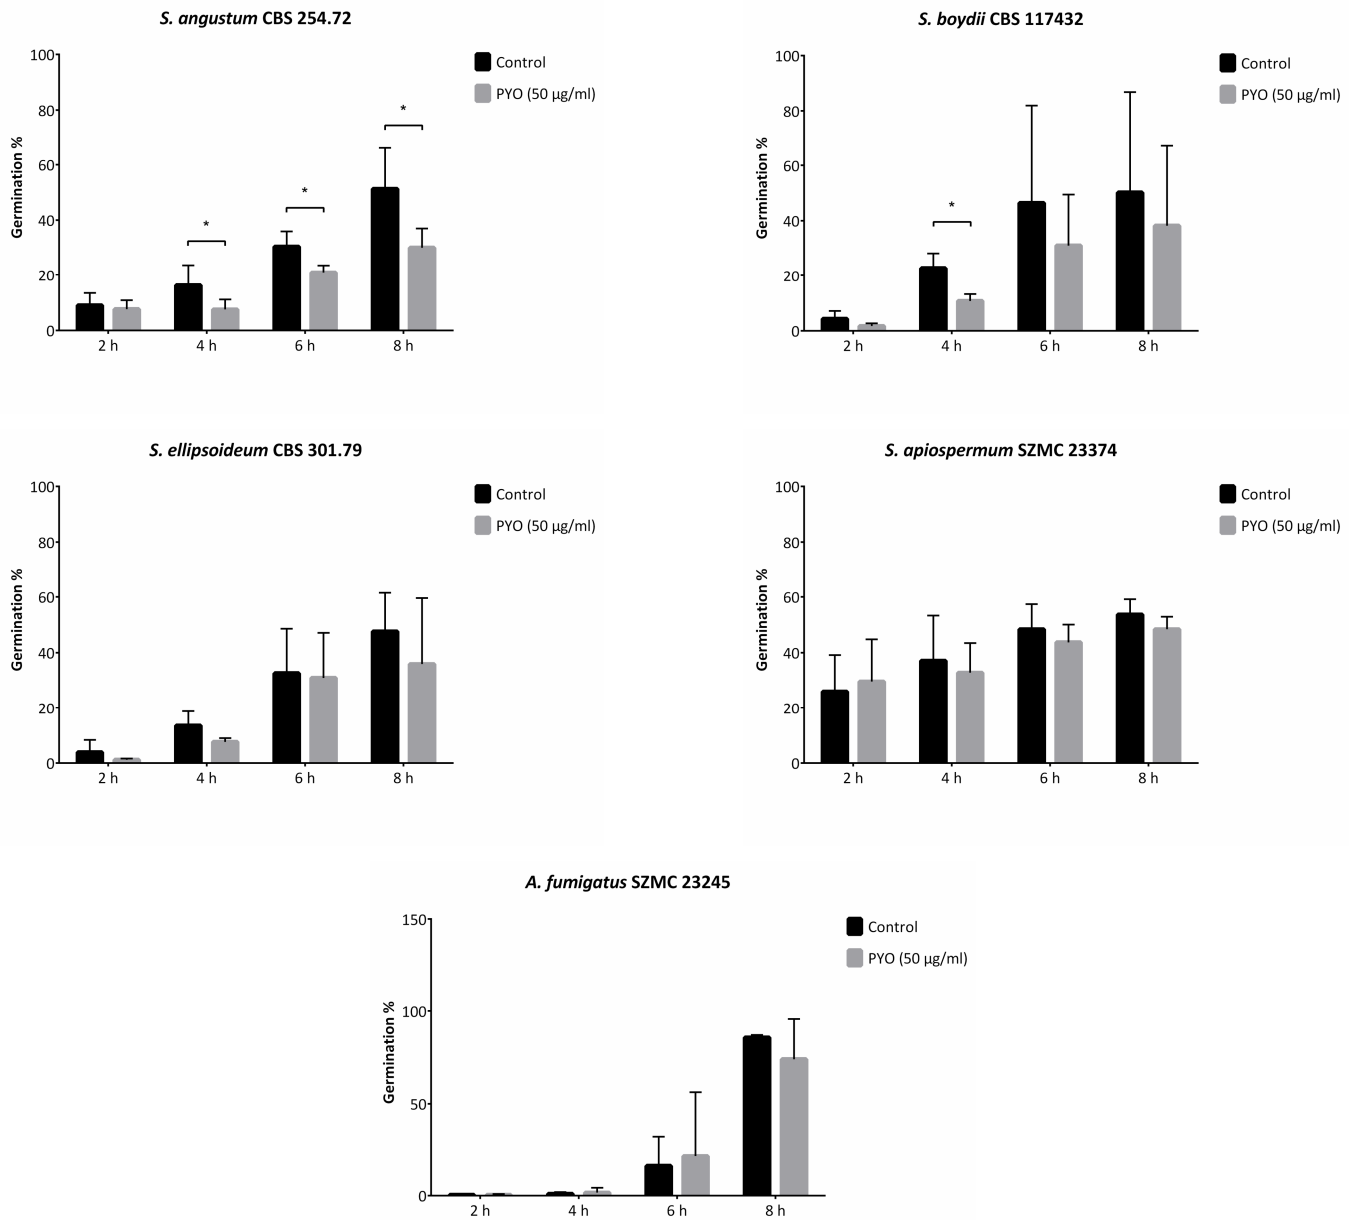

**Figure 4S** Germination ability of conidia collected from *Scedosporium* and *A. fumigatus* isolates in the presence of 50 µg/ml pyocyanin. Results are the mean of three independent experiments. Error bars indicate standard deviations. P values were calculated using unpaired t test, where  $p < 0.05$  was considered to be significant (indicated with asterisks).

## Inter-kingdom interactions between CF pathogens.

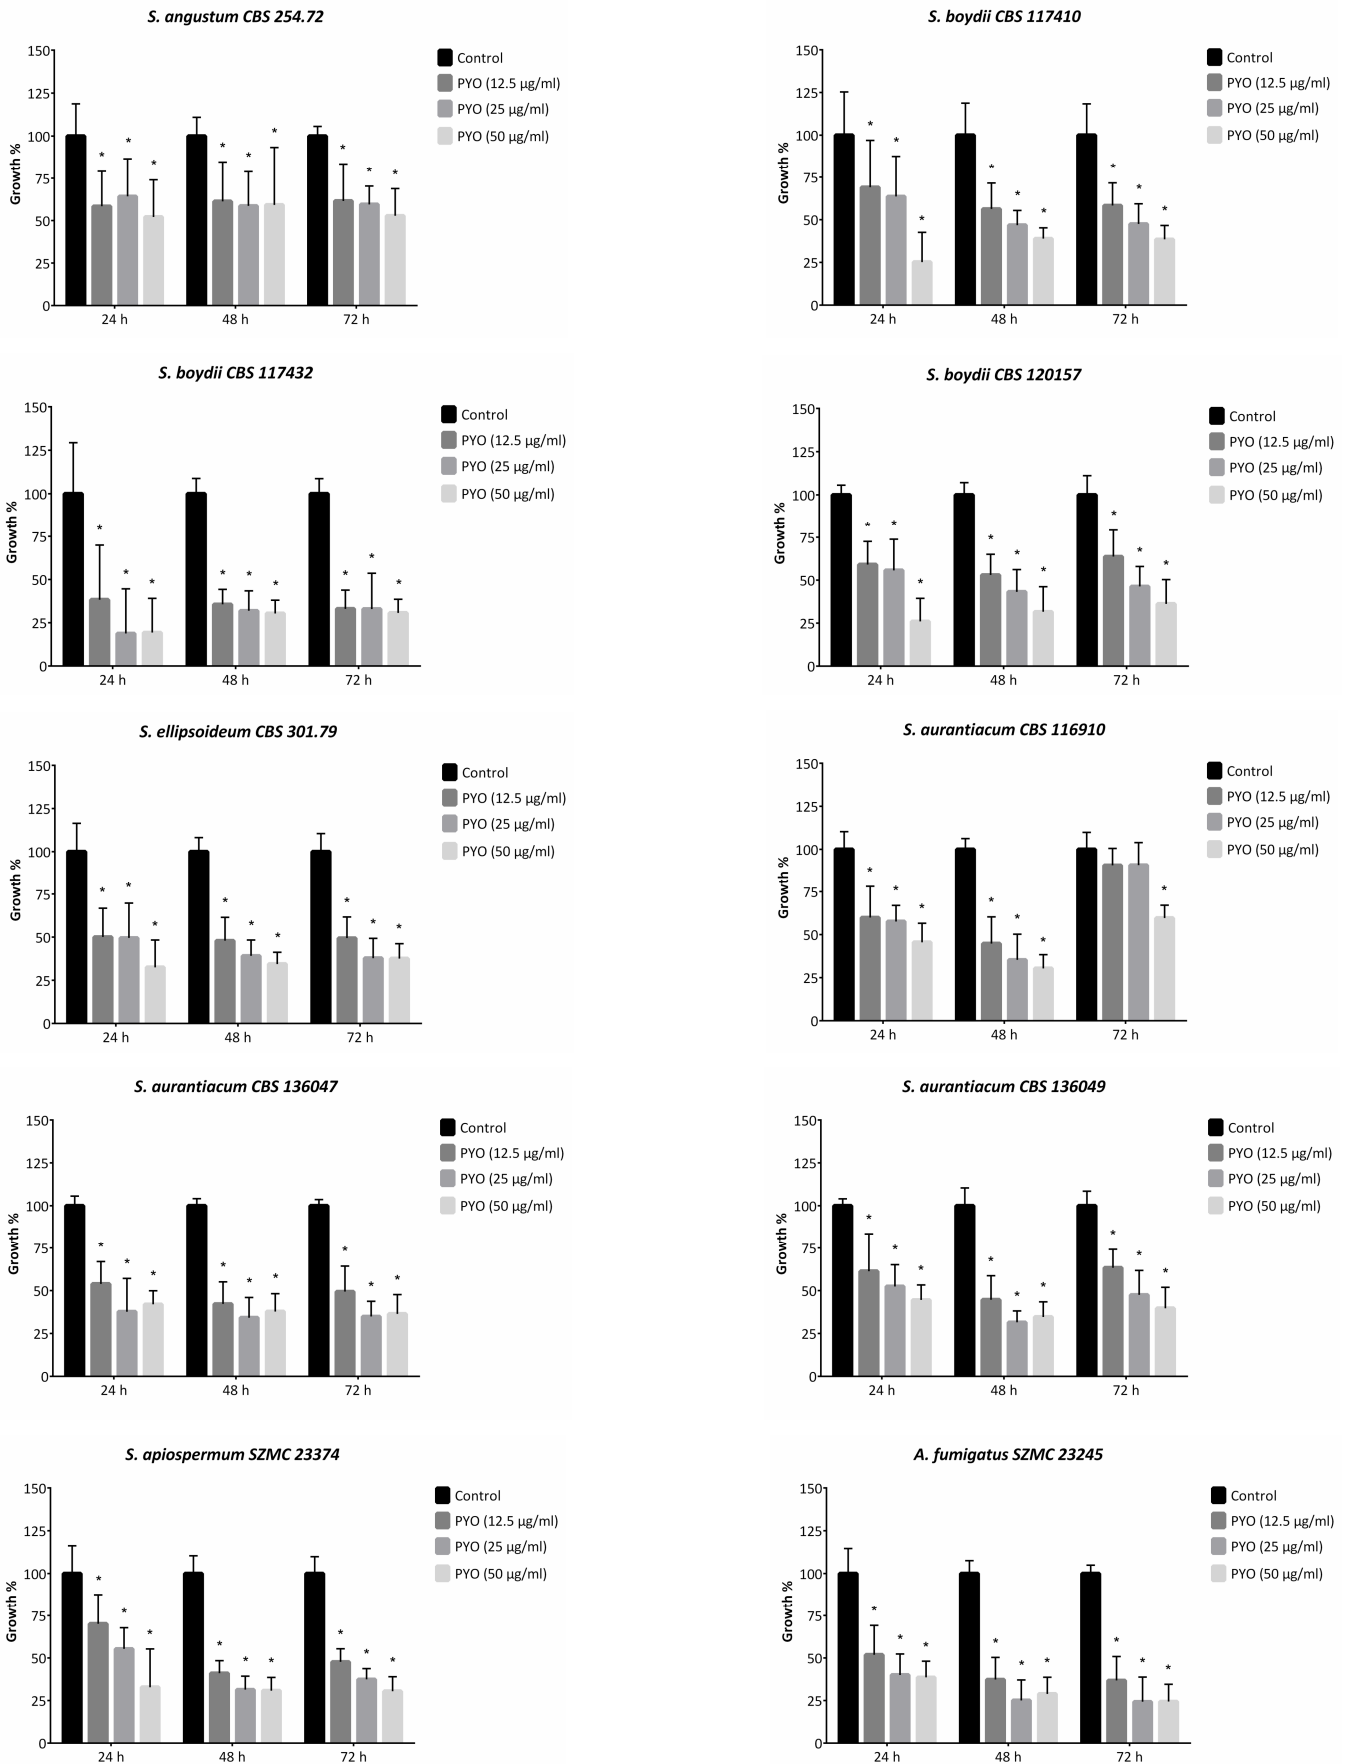

**Figure 5S** Growth rate of *Scedosporium* and *A. fumigatus* isolates in the presence of 50 µg/ml pyocyanin. Results are the mean of three independent experiments with three individual replicates. Error bars indicate standard deviations. P values were calculated using unpaired t test, where  $p < 0.05$  was considered to be significant (indicated with asterisks).

## Inter-kingdom interactions between CF pathogens.

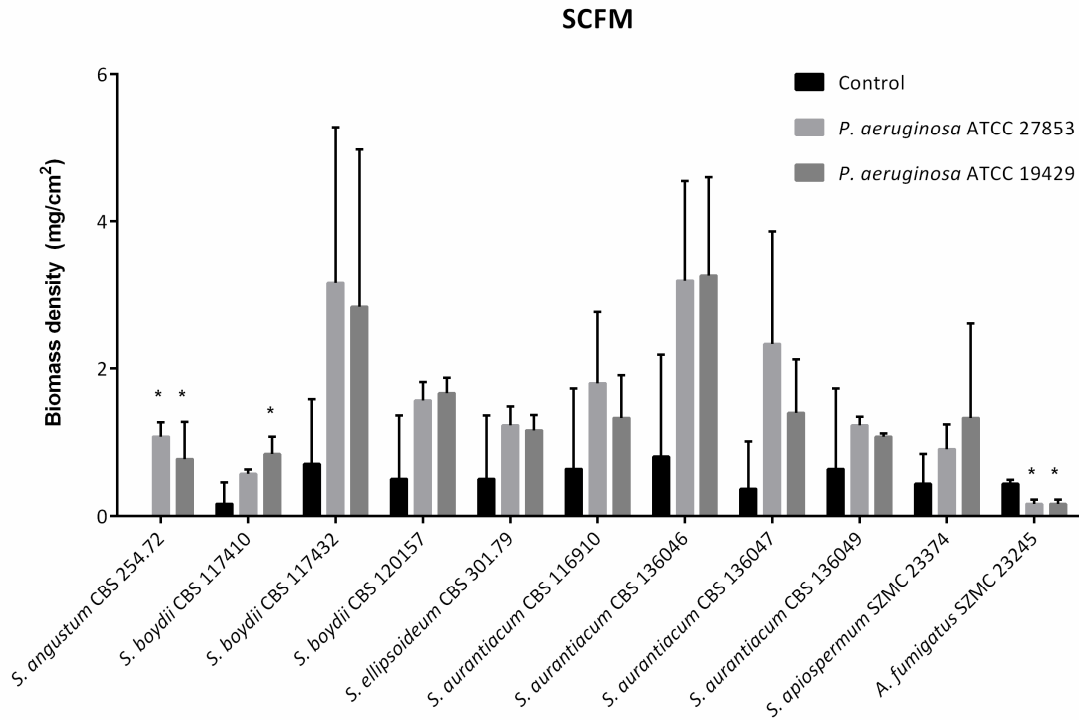

**Figure 6S** The biomass densities of *Scedosporium* and *Aspergillus fumigatus* isolates grown on synthetic cystic fibrosis medium (SCFM) in the plate-in-plate tests in absence (control) and in the presence of *Pseudomonas aeruginosa* strains ATCC 27853 and 19429. Results are the mean of three independent experiments. Error bars indicate standard deviations. P values were calculated using unpaired t test, where  $p < 0.05$  was considered to be significant (indicated with asterisks).

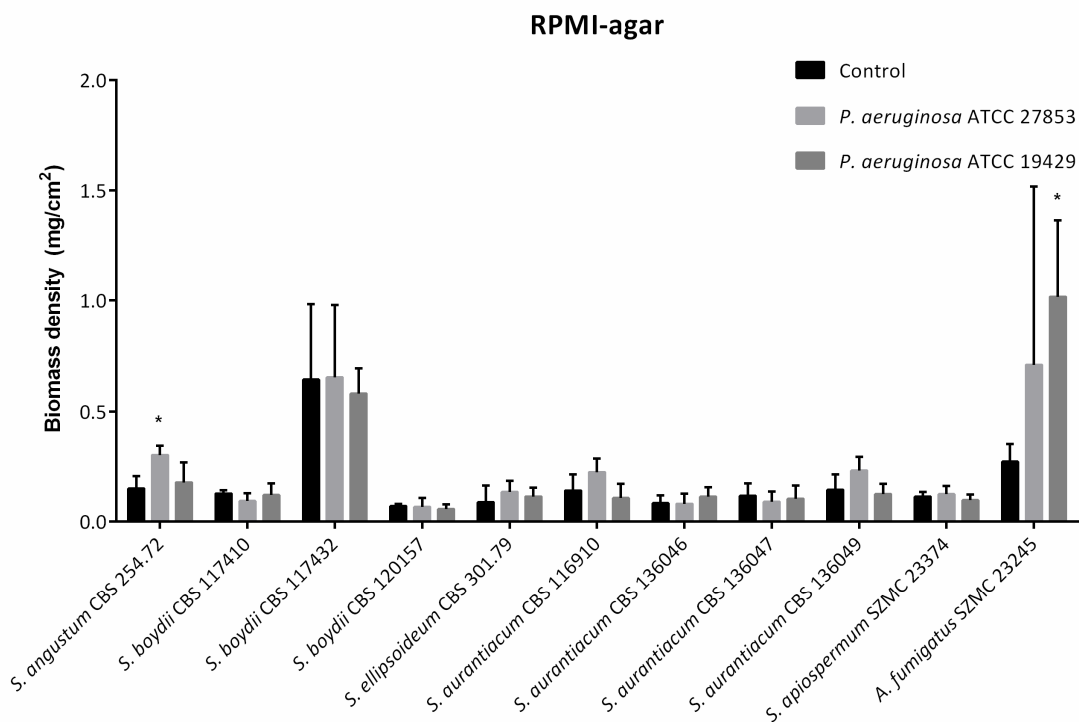

**Figure 7S** The biomass densities of *Scedosporium* and *Aspergillus fumigatus* isolates grown on RPMI-agar in the plate-in-plate tests in absence (control) and in the presence of *Pseudomonas aeruginosa* strains ATCC 27853 and 19429. Results are the mean of three independent experiments. Error bars indicate standard deviations. P values were calculated using unpaired t test, where  $p < 0.05$  was considered to be significant (indicated with asterisks).



## Inter-kingdom interactions between CF pathogens.

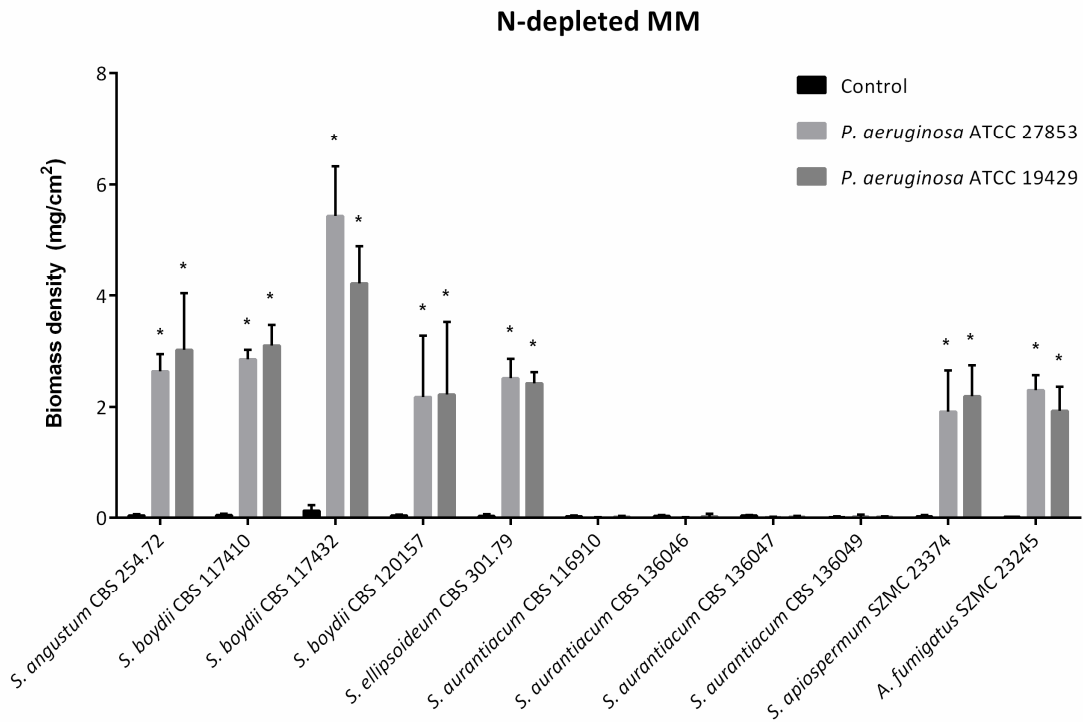

**Figure 8S** The biomass densities of *Scedosporium* and *Aspergillus fumigatus* isolates grown on nitrogen-depleted minimal medium (N-depleted MM) in the plate-in-plate tests in absence (control) and in the presence of *Pseudomonas aeruginosa* strains ATCC 27853 and 19429. Results are the mean of three independent experiments. Error bars indicate standard deviations. P values were calculated using unpaired t test, where  $p < 0.05$  was considered to be significant (indicated with asterisks).

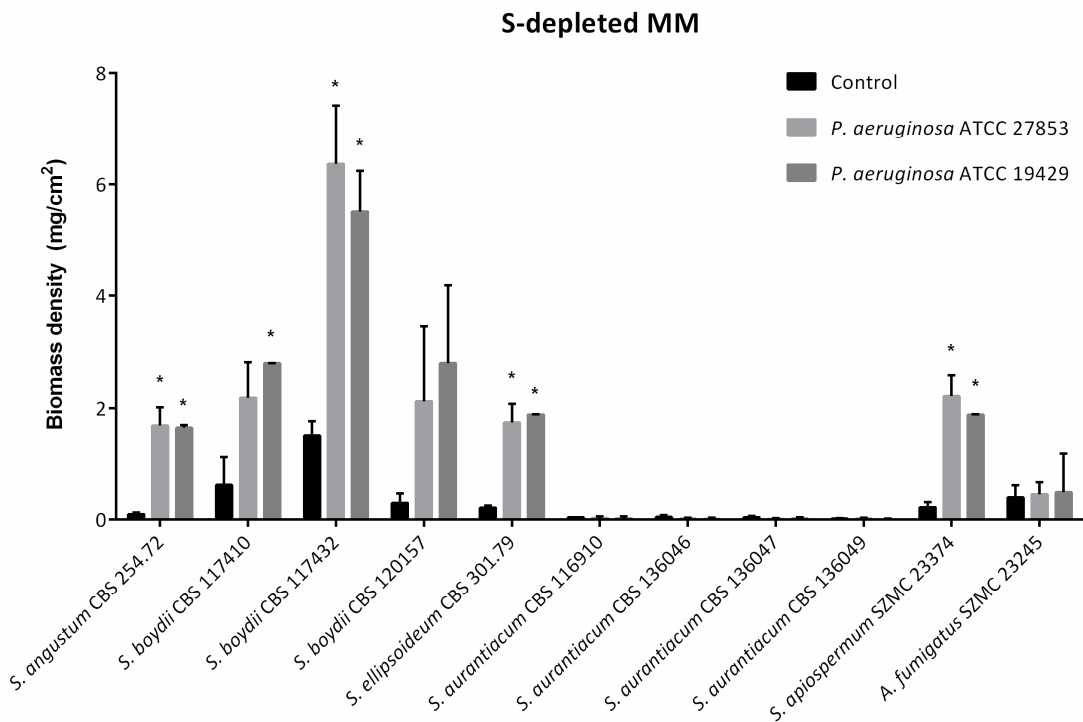

**Figure 9S** The biomass densities of *Scedosporium* and *Aspergillus fumigatus* isolates grown on sulfur-depleted minimal medium (S-depleted MM) in the plate-in-plate tests in absence (control) and in the presence of *Pseudomonas aeruginosa* strains ATCC 27853 and 19429. Results are the mean of three independent experiments. Error bars indicate standard deviations. P values were calculated using unpaired t test, where  $p < 0.05$  was considered to be significant (indicated with asterisks).

## Inter-kingdom interactions between CF pathogens.

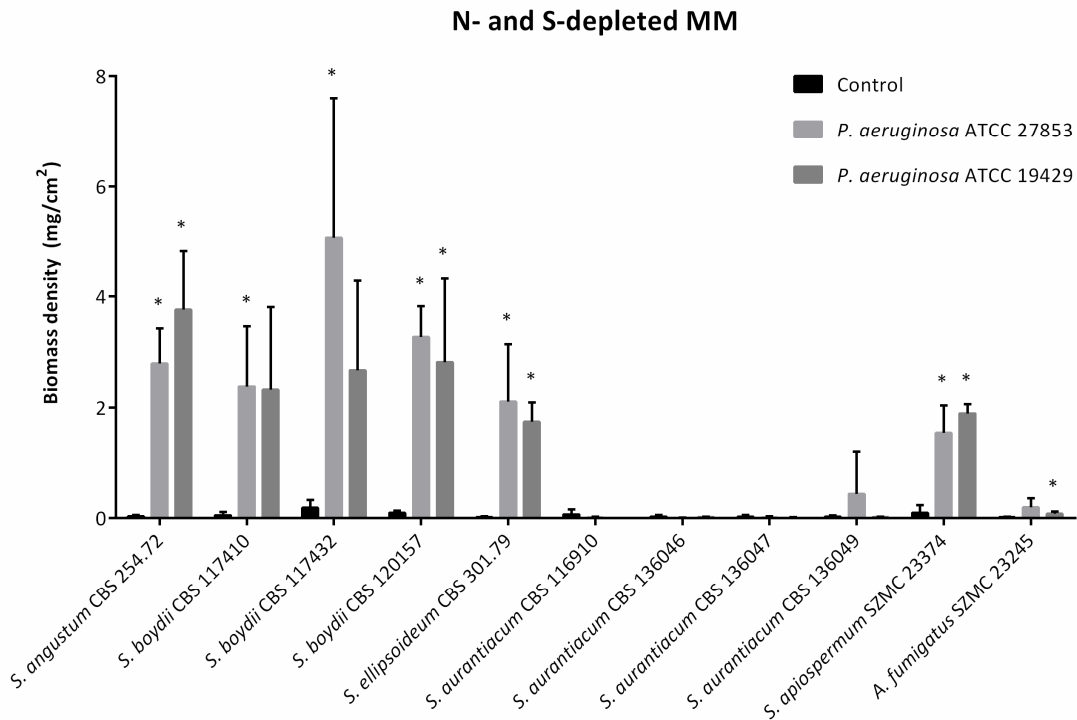

**Figure 10S** The biomass densities of *Scedosporium* and *Aspergillus fumigatus* isolates grown on nitrogen- and sulfur-depleted minimal medium (N- and S-depleted MM) in the plate-in-plate tests in absence (control) and in the presence of *Pseudomonas aeruginosa* strains ATCC 27853 and 19429. Results are the mean of three independent experiments. Error bars indicate standard deviations. P values were calculated using unpaired t test, where  $p < 0.05$  was considered to be significant (indicated with asterisks).

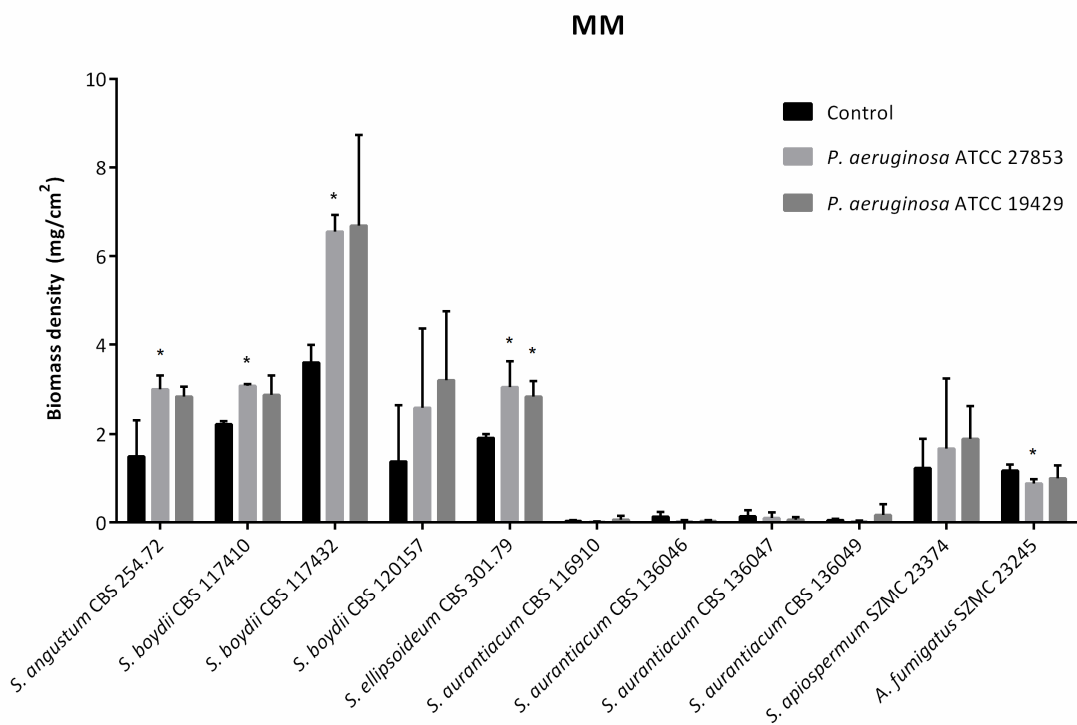

**Figure 11S** The biomass densities of *Scedosporium* and *Aspergillus fumigatus* isolates grown on minimal medium (MM) in the plate-in-plate tests in absence (control) and in the presence of *Pseudomonas aeruginosa* strains ATCC 27853 and 19429. Results are the mean of three independent experiments. Error bars indicate standard deviations. P values were calculated using unpaired t test, where  $p < 0.05$  was considered to be significant (indicated with asterisks).

## Inter-kingdom interactions between CF pathogens.

### C- and N-depleted MM

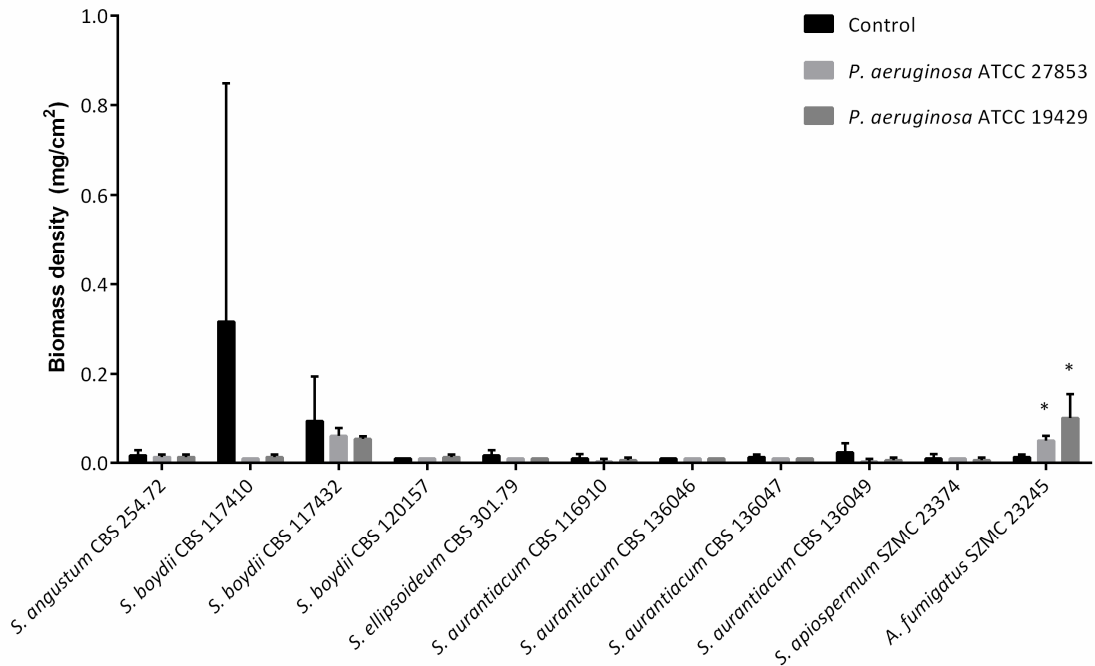

**Figure 12S** The biomass densities of *Scedosporium* and *Aspergillus fumigatus* isolates grown on carbon- and nitrogen-depleted minimal medium (C- and N-depleted MM) in the plate-in-plate tests in absence (control) and in the presence of *Pseudomonas aeruginosa* strains ATCC 27853 and 19429. Results are the mean of three independent experiments. Error bars indicate standard deviations. P values were calculated using unpaired t test, where  $p < 0.05$  was considered to be significant (indicated with asterisks).

### C-depleted MM

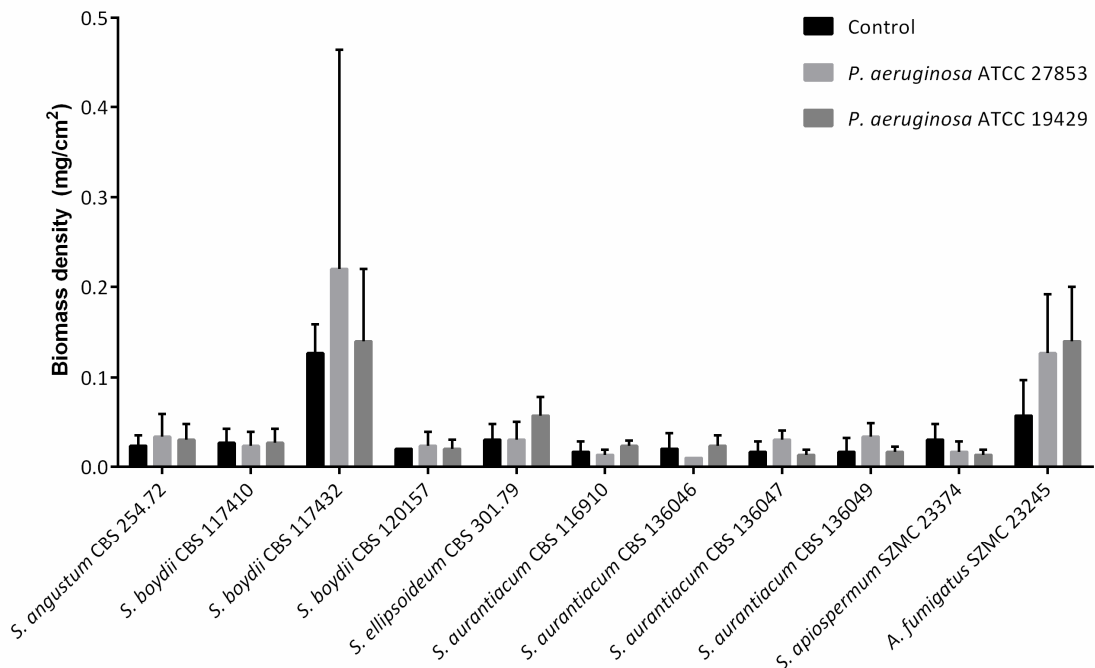

**Figure 13S** The biomass densities of *Scedosporium* and *Aspergillus fumigatus* isolates grown on carbon-depleted minimal medium (C-depleted MM) in the plate-in-plate tests in absence (control) and in the presence of *Pseudomonas aeruginosa* strains ATCC 27853 and 19429. Results are the mean of three independent experiments. Error bars indicate standard deviations. P values were calculated using unpaired t test, where  $p < 0.05$  was considered to be significant (indicated with asterisks).

## Inter-kingdom interactions between CF pathogens.

### C- and S-depleted MM

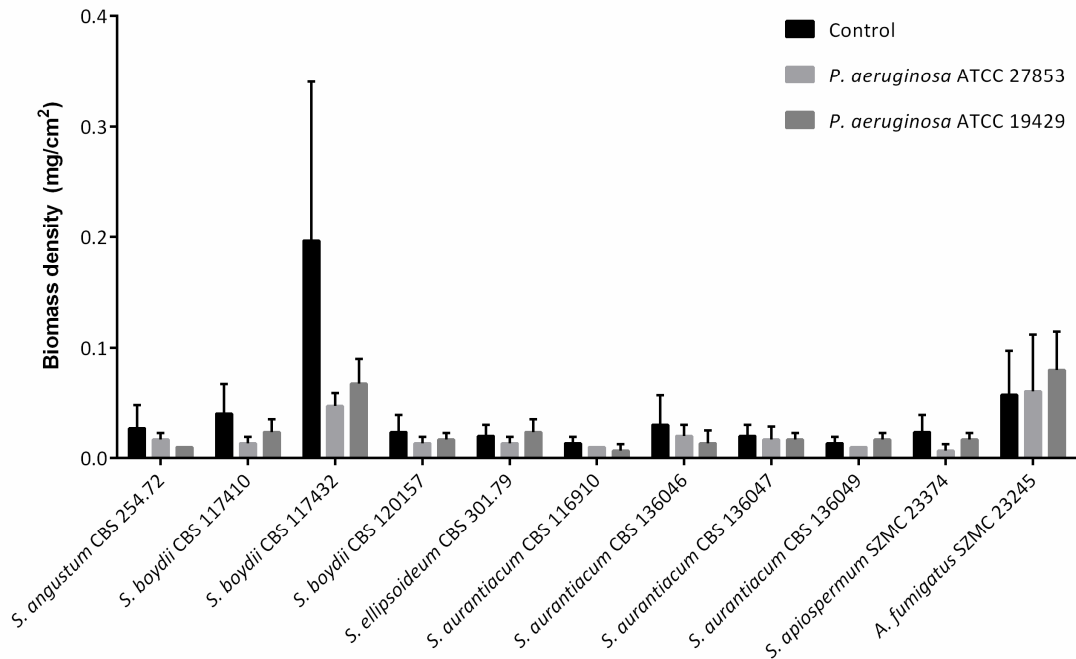

**Figure 14S** The biomass densities of *Scedosporium* and *Aspergillus fumigatus* isolates grown on carbon- and sulfur-depleted minimal medium (C- and S-depleted MM) in the plate-in-plate tests in absence (control) and in the presence of *Pseudomonas aeruginosa* strains ATCC 27853 and 19429. Results are the mean of three independent experiments. Error bars indicate standard deviations. P values were calculated using unpaired t test, where  $p < 0.05$  was considered to be significant (indicated with asterisks).

### C-, N- and S-depleted MM

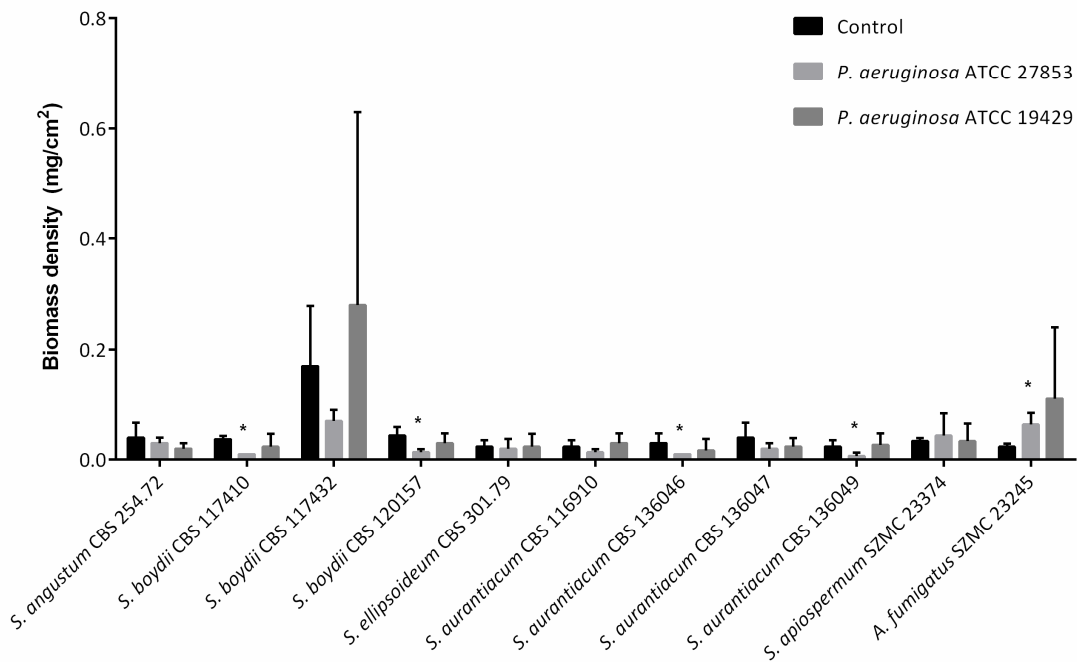

**Figure 15S** The biomass densities of *Scedosporium* and *Aspergillus fumigatus* isolates grown on carbon-, nitrogen and sulfur-depleted minimal medium (C-, N- and S-depleted MM) in the plate-in-plate tests in absence (control) and in the presence of *Pseudomonas aeruginosa* strains ATCC 27853 and 19429. Results are the mean of three independent experiments. Error bars indicate standard deviations. P values

### **Inter-kingdom interactions between CF pathogens.**

were calculated using unpaired t test, where  $p < 0.05$  was considered to be significant (indicated with asterisks).

## Inter-kingdom interactions between CF pathogens.

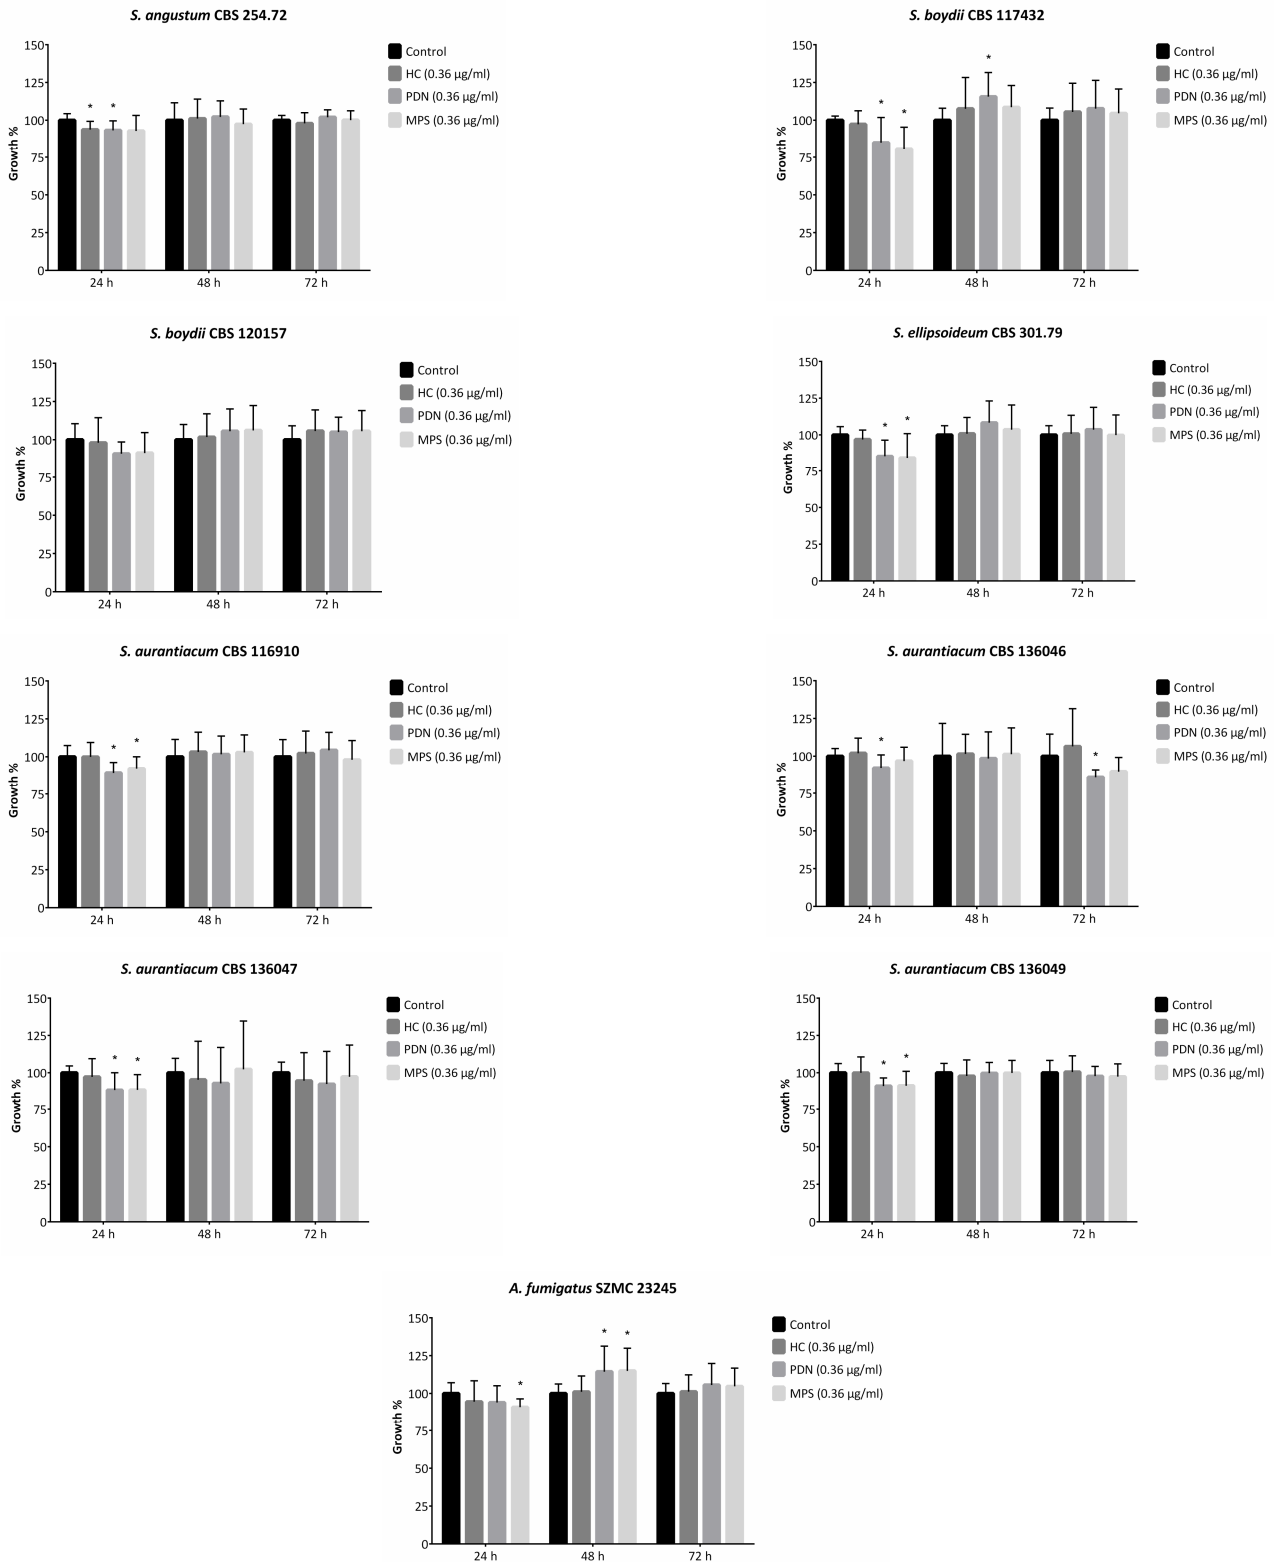

**Figure 16S** Growth rate of *Scedosporium* and *A. fumigatus* isolates in the presence of  $10^{-6}$  M (approx.  $0.36 \mu\text{g/ml}$ ) corticosteroid compounds (*i.e.*, hydrocortisone, HC; prednisone, PDN; methylprednisolone, MPS). Results are the mean of three independent experiments with three individual replicates. Error bars indicate standard deviations. P values were calculated using unpaired t test, where  $p < 0.05$  was considered to be significant (indicated with asterisks).

## Inter-kingdom interactions between CF pathogens.

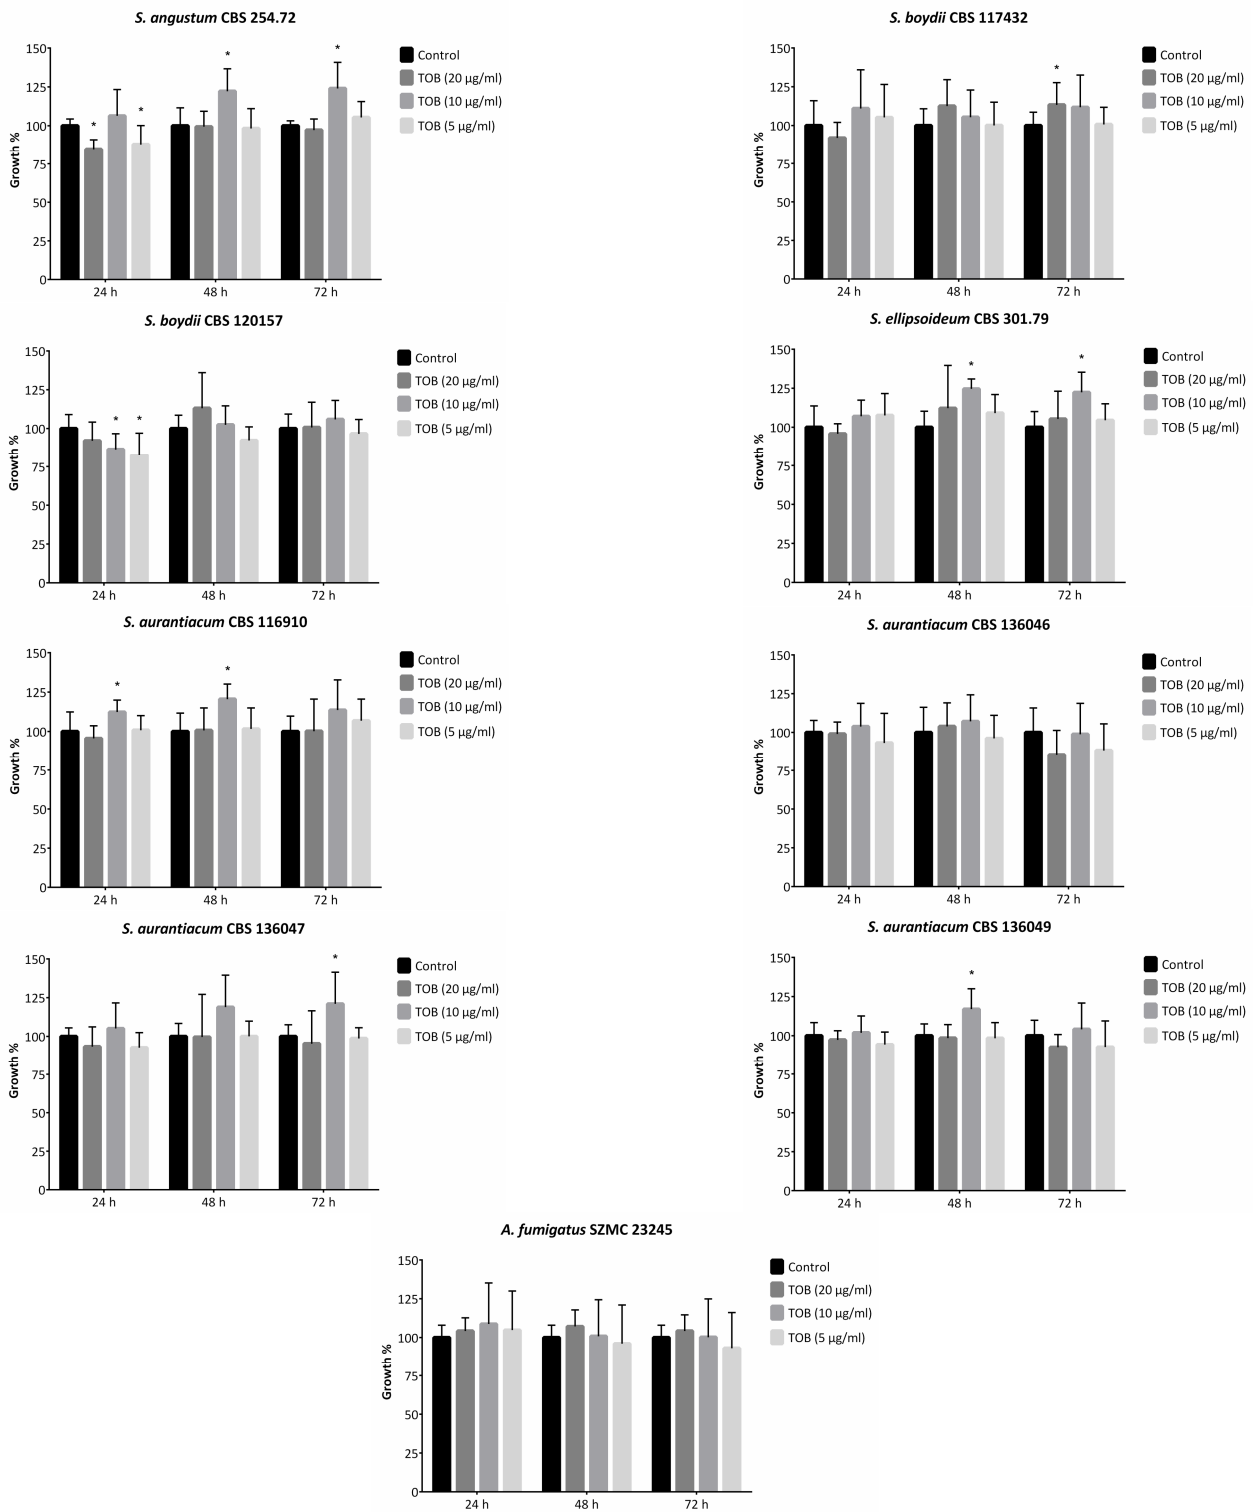

**Figure 17S** Growth rate of *Scedosporium* and *A. fumigatus* isolates in the presence of tobramycin (TOB). Results are the mean of three independent experiments with three individual replicates. Error bars indicate standard deviations. P values were calculated using unpaired t test, where  $p < 0.05$  was considered to be significant (indicated with asterisks).

## Inter-kingdom interactions between CF pathogens.

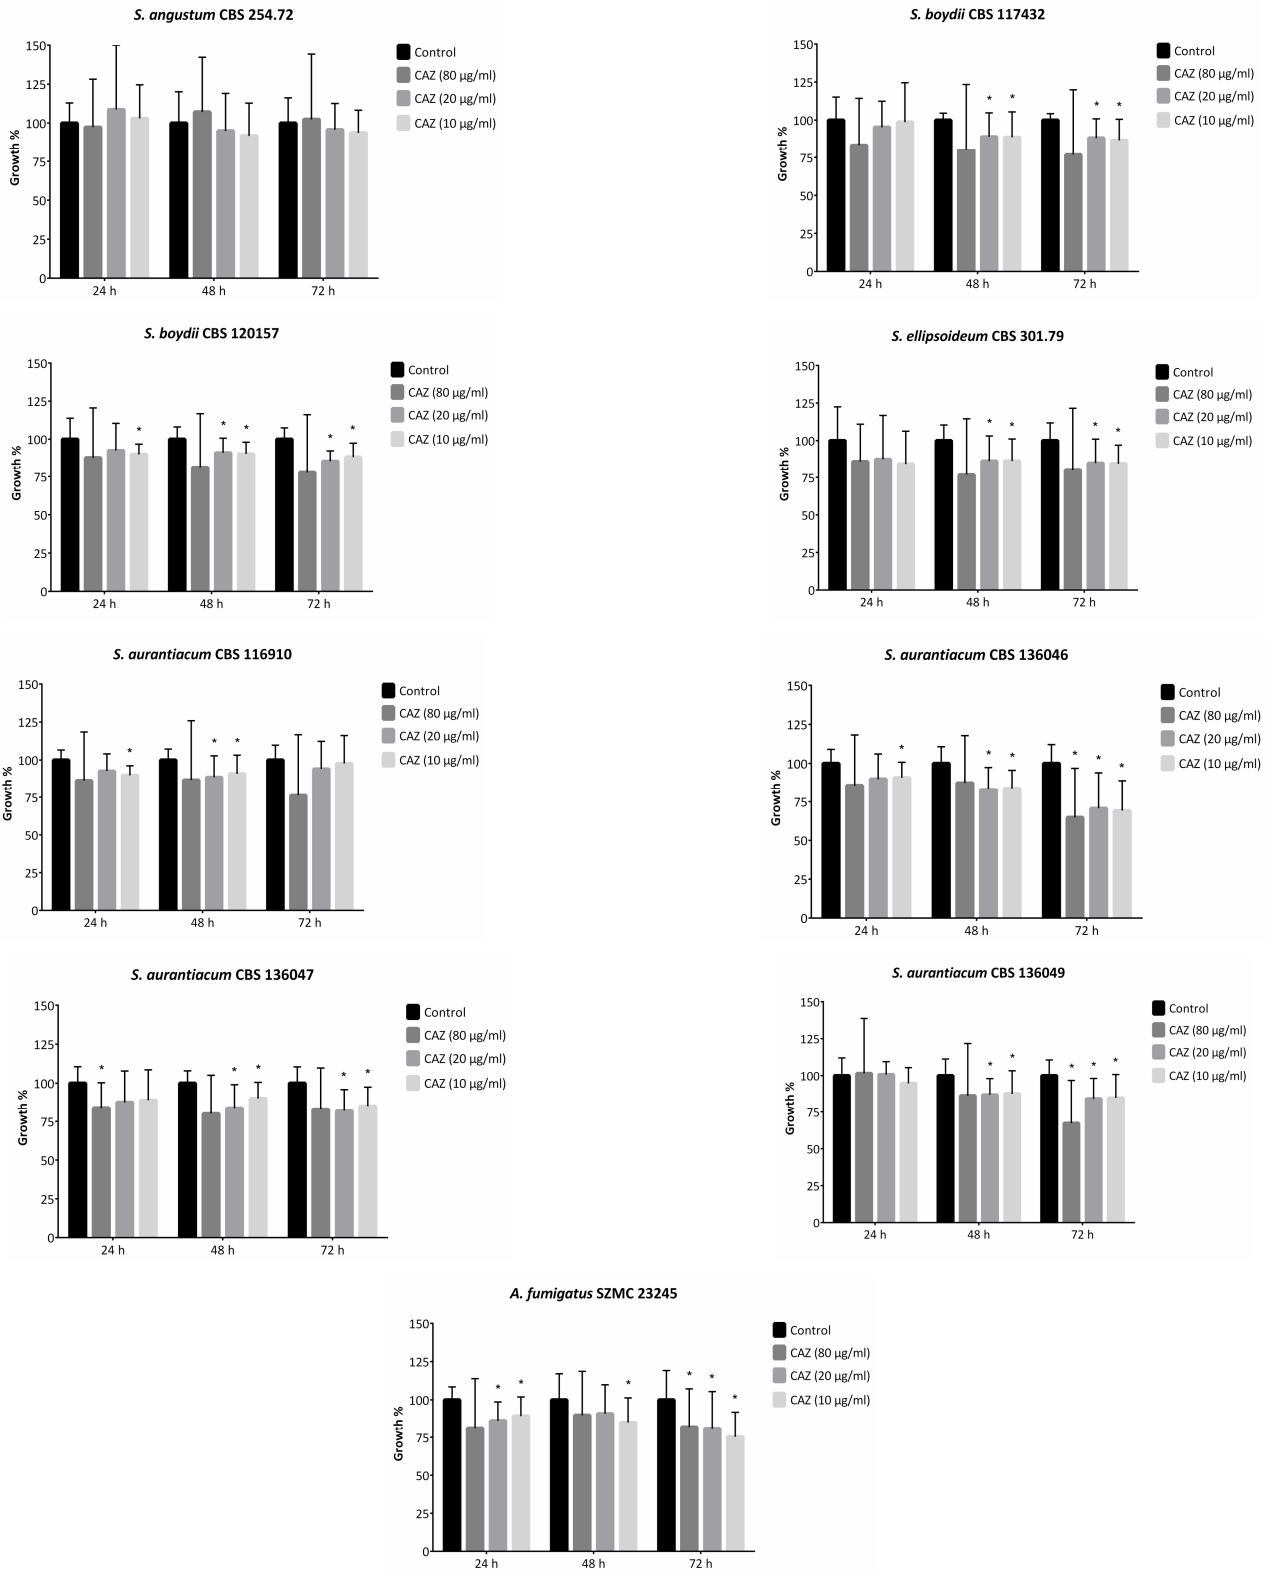

**Figure 18S** Growth rate of *Scedosporium* and *A. fumigatus* isolates in the presence of ceftazidime (CAZ). Results are the mean of three independent experiments with three individual replicates. Error bars indicate standard deviations. P values were calculated using unpaired t test, where  $p < 0.05$  was considered to be significant (indicated with asterisks).



## Inter-kingdom interactions between CF pathogens.

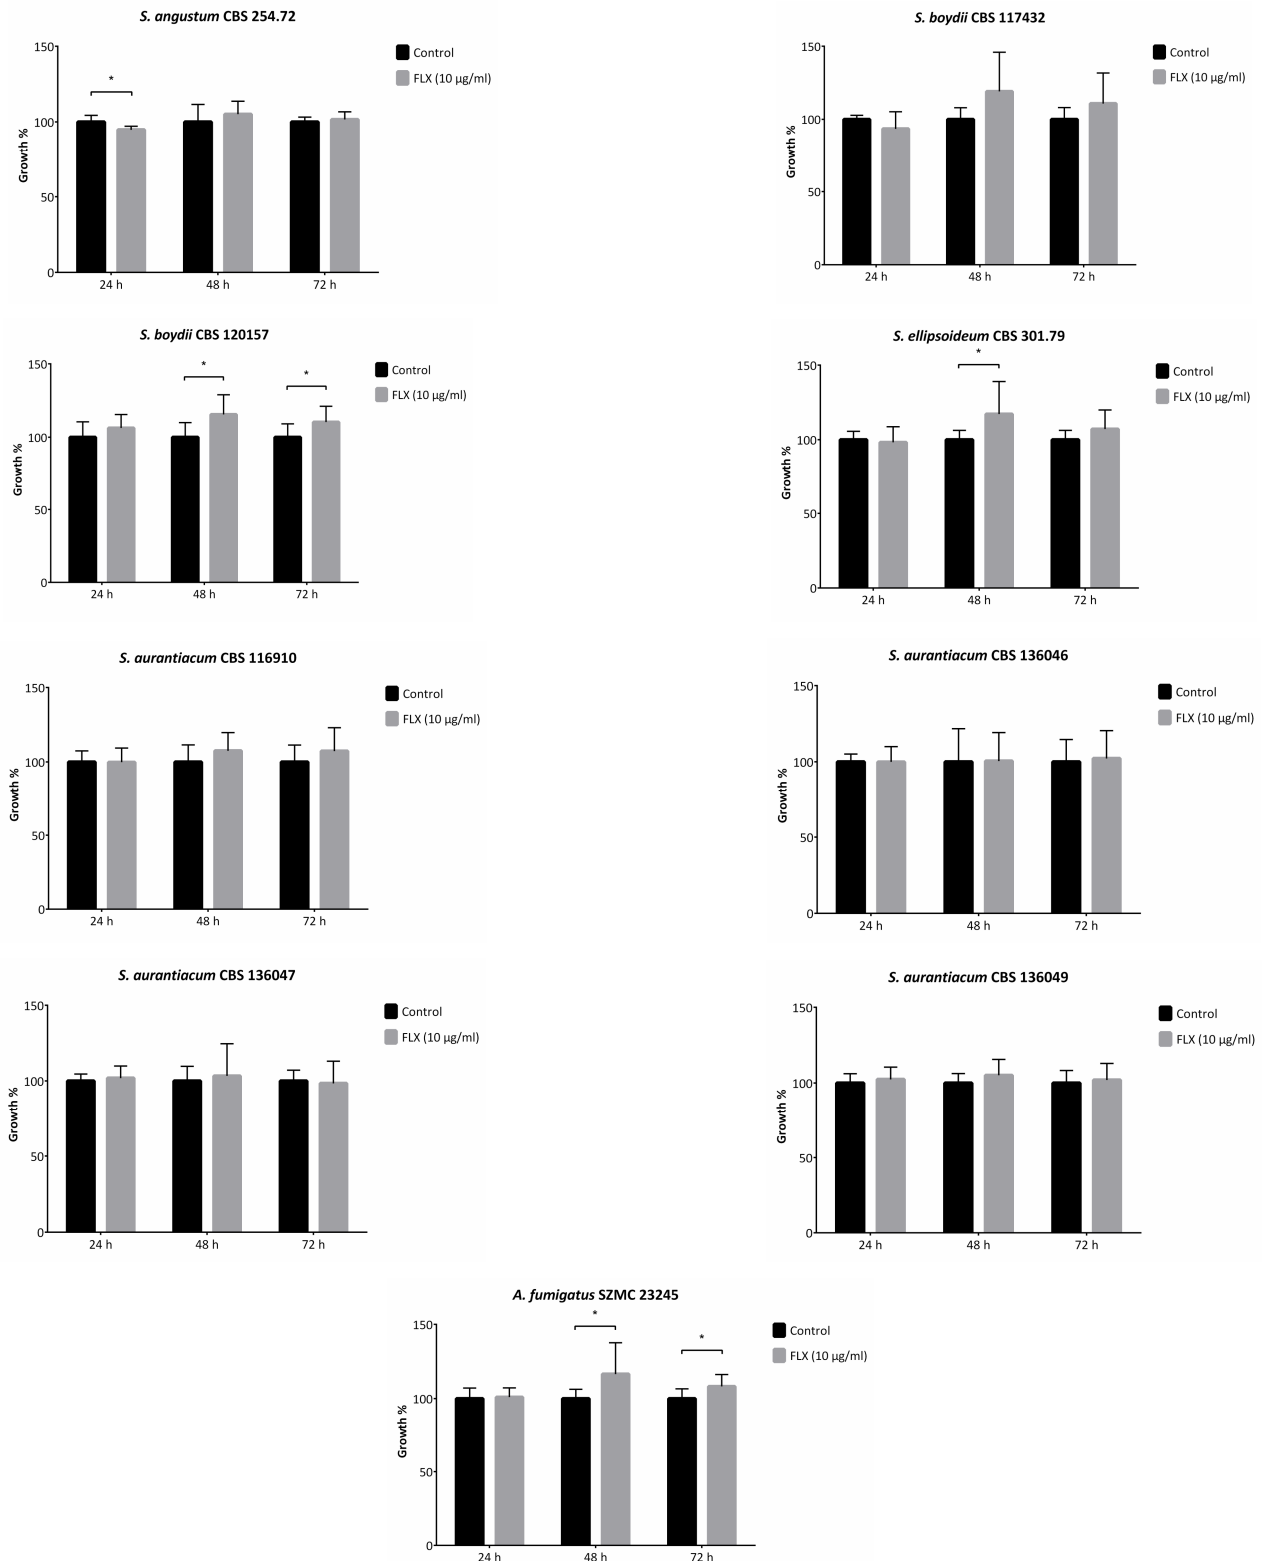

**Figure 19S** Growth rate of *Scedosporium* and *A. fumigatus* isolates in the presence of 10 µg/ml flucloxacillin (FLX). Results are the mean of three independent experiments with three individual replicates. Error bars indicate standard deviations. P values were calculated using unpaired t test, where p<0.05 was considered to be significant (indicated with asterisks).
